# Supplementary material for: PremPS: Predicting the impact of missense mutations on protein stability
Source: PubMed Central journal article supplement (PMC7802934; doi:10.1371/journal.pcbi.1008543), 2020-12-30

A.

### The number of single mutations for each protein structure

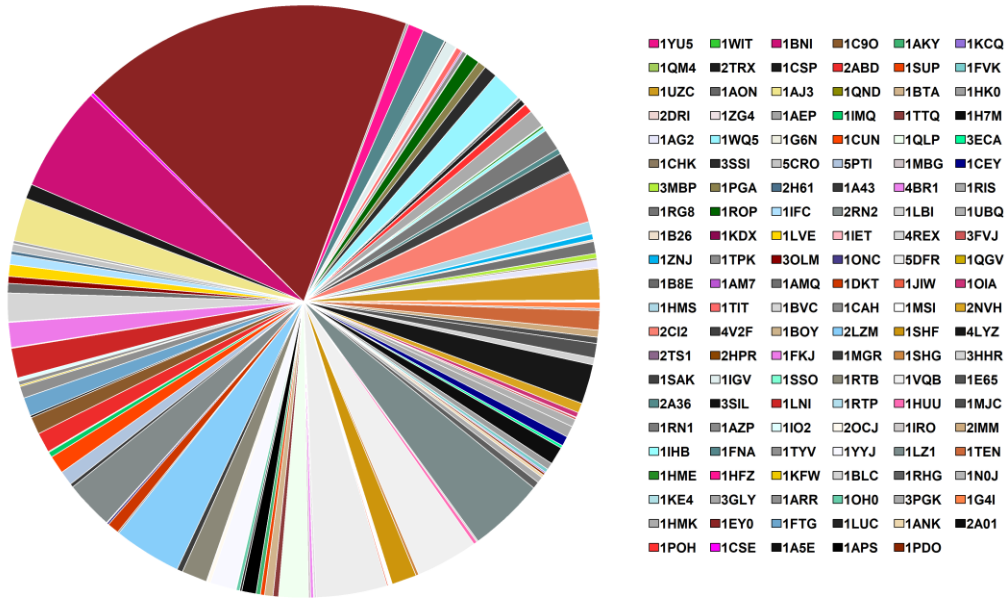

B.

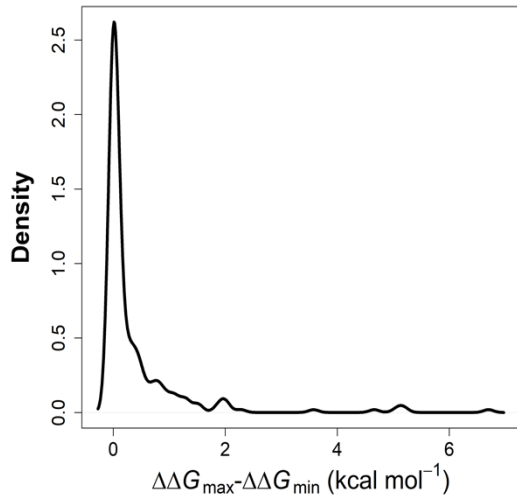

C.

### The composition of S921

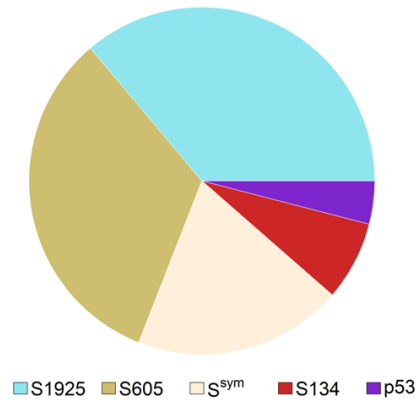

Supplement: pcbi.1008543.s001.pdf [file pcbi.1008543.s001.pdf]
