# Supplementary material for: PremPS: Predicting the impact of missense mutations on protein stability
Source: PubMed Central journal article supplement (PMC7802934; doi:10.1371/journal.pcbi.1008543), 2020-12-30
Supplement: pcbi.1008543.s003.pdf [file pcbi.1008543.s003.pdf]

### A. Test on S5296

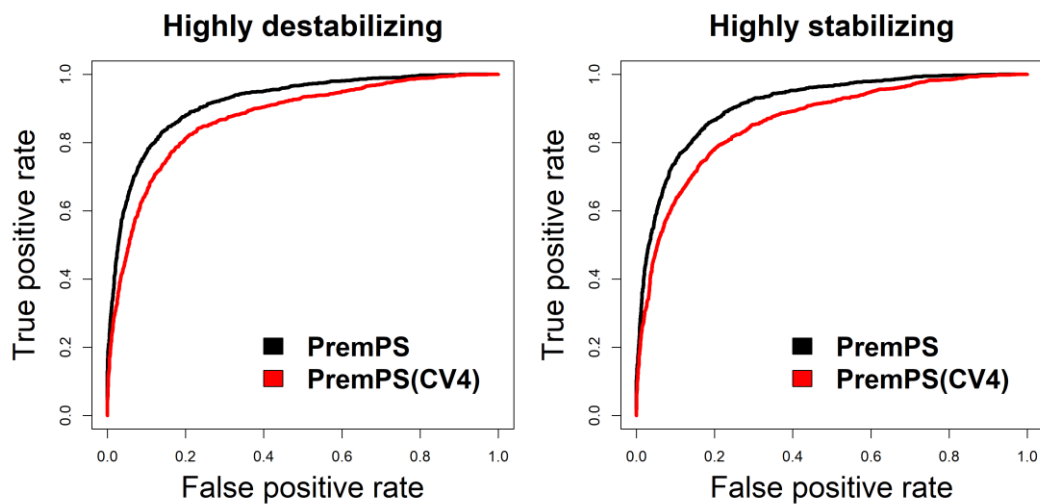

### B. Test on S921

| Method   | Highly destabilizing |      | Highly stabilizing |      |
|----------|----------------------|------|--------------------|------|
|          | AUC                  | MCC  | AUC                | MCC  |
| PremPS   | 0.88                 | 0.61 | 0.87               | 0.58 |
| INPS3D   | 0.83                 | 0.54 | 0.79               | 0.43 |
| PoPMuSiC | 0.81                 | 0.49 | 0.67               | 0.21 |
| FoldX    | 0.80                 | 0.49 | 0.72               | 0.35 |
| mCSM     | 0.75                 | 0.44 | 0.61               | 0.14 |

### C.

| Category             |          | Definition                                                 | # of mutations |      |
|----------------------|----------|------------------------------------------------------------|----------------|------|
|                      |          |                                                            | S5296          | S921 |
| Highly destabilizing | Positive | $\Delta\Delta G_{exp}$ (kcal mol <sup>-1</sup> ) $\geq 1$  | 1364           | 360  |
|                      | Negative | $\Delta\Delta G_{exp}$ (kcal mol <sup>-1</sup> ) $< 1$     | 3932           | 561  |
| Highly stabilizing   | Positive | $\Delta\Delta G_{exp}$ (kcal mol <sup>-1</sup> ) $\leq -1$ | 1364           | 109  |
|                      | Negative | $\Delta\Delta G_{exp}$ (kcal mol <sup>-1</sup> ) $> -1$    | 3932           | 812  |
