# Supplementary material for: PremPS: Predicting the impact of missense mutations on protein stability
Source: PubMed Central journal article supplement (PMC7802934; doi:10.1371/journal.pcbi.1008543), 2020-12-30
Supplement: pcbi.1008543.s004.pdf [file pcbi.1008543.s004.pdf]

**A.**

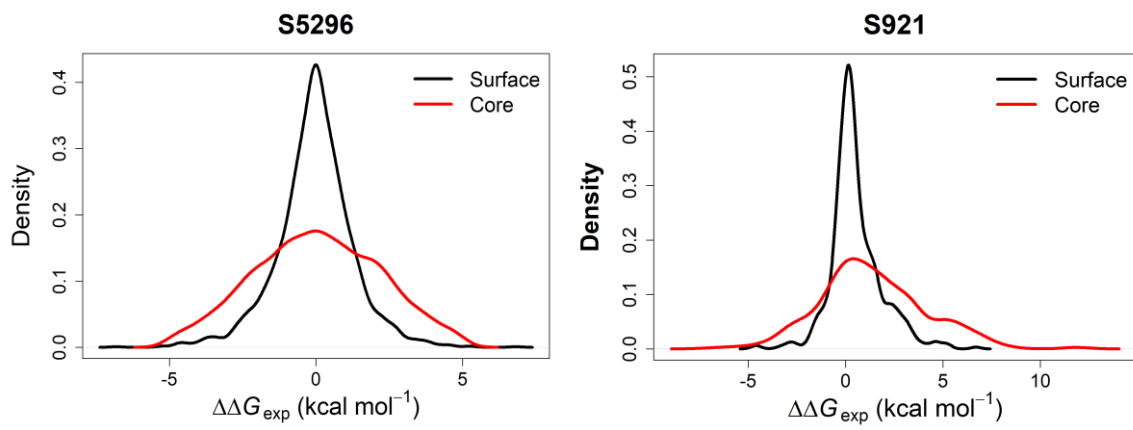

**B.**

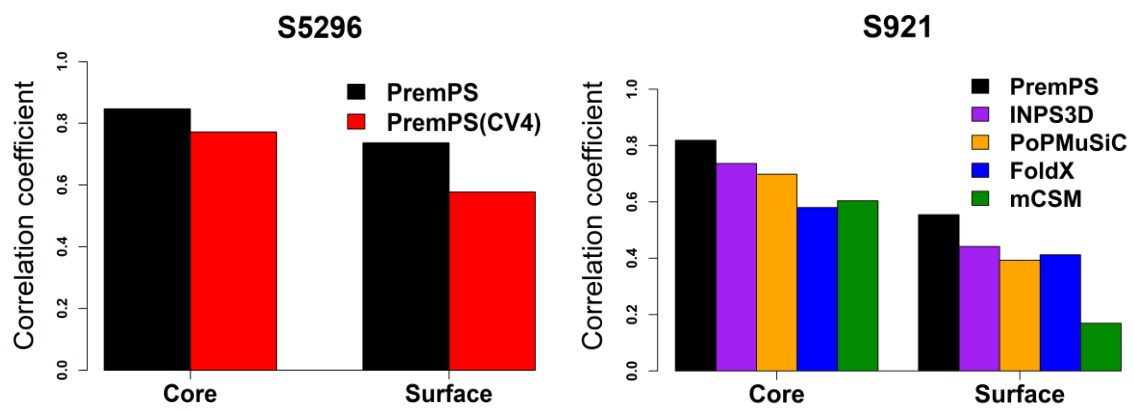

**C. The number of mutations**

| Category | S5296 | S921 |
|----------|-------|------|
| Core     | 2706  | 430  |
| Surface  | 2590  | 491  |
