# Supplementary material for: PremPS: Predicting the impact of missense mutations on protein stability
Source: PubMed Central journal article supplement (PMC7802934; doi:10.1371/journal.pcbi.1008543), 2020-12-30

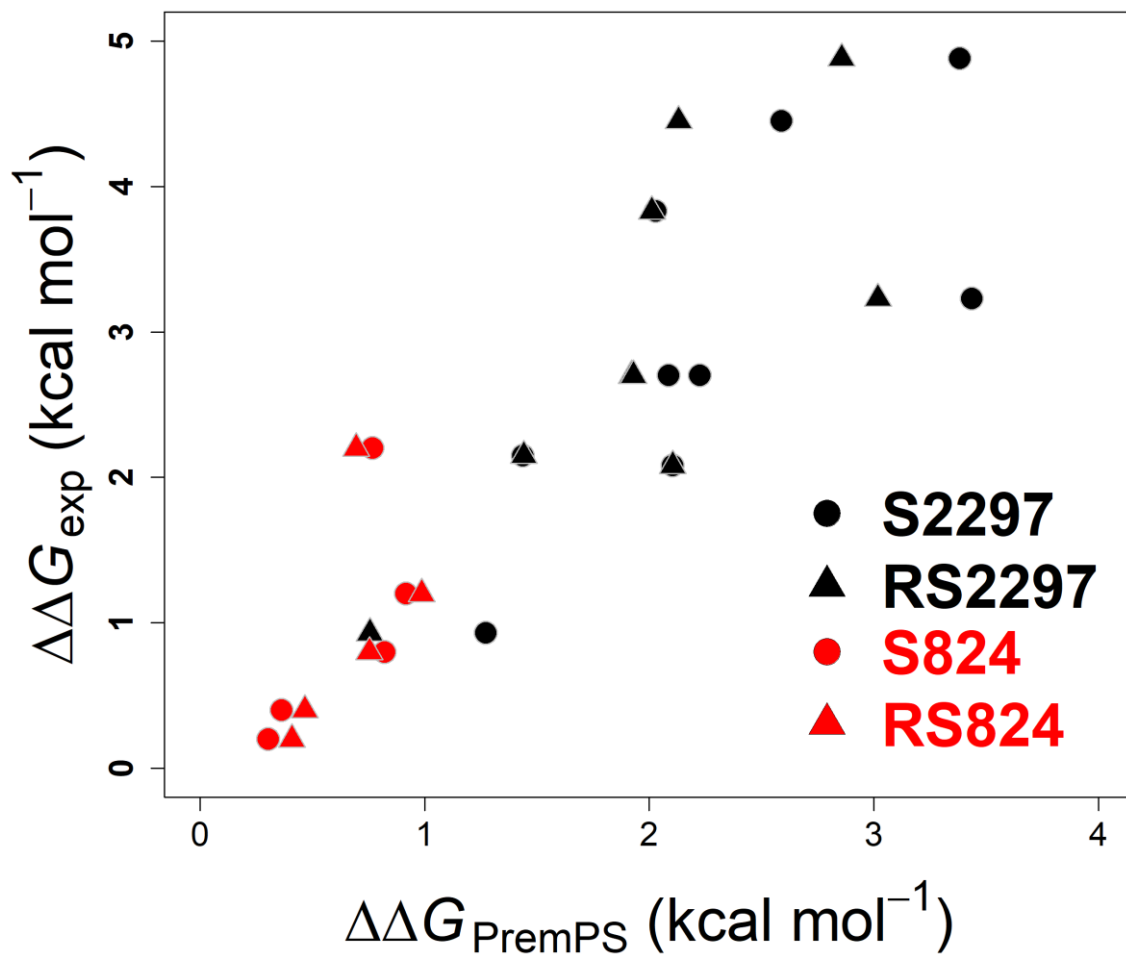

Supplement: pcbi.1008543.s007.pdf [file pcbi.1008543.s007.pdf]
