# Supplementary material for: PremPS: Predicting the impact of missense mutations on protein stability
Source: PubMed Central journal article supplement (PMC7802934; doi:10.1371/journal.pcbi.1008543), 2020-12-30

A.

Job id: 2020060501421741365460632

• Summary

| PDB ID | Chains | Number of mutations | Start time (EST) | Processing time | Results                  |
|--------|--------|---------------------|------------------|-----------------|--------------------------|
| 1U7S   | A      | 3                   | 2020-06-04 20:42 | 5 min           | <a href="#">Download</a> |

• Results

| # | Mutated Chain | Mutation | $\Delta\Delta G$ | Location | Structure               |
|---|---------------|----------|------------------|----------|-------------------------|
| 1 | A             | Q26A     | -0.64            | COR      | <a href="#">Explore</a> |
| 2 | A             | L104D    | 1.82             | COR      | <a href="#">Explore</a> |
| 3 | A             | R118C    | 0.27             | SUR      | <a href="#">Explore</a> |

Click

B.

Non-covalent Interactions Viewer

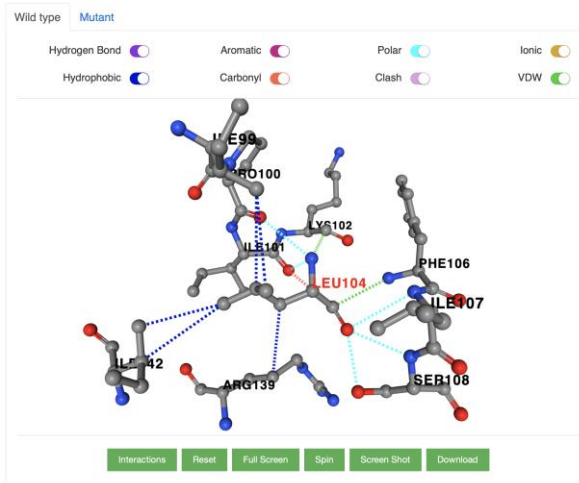

Non-covalent Interactions Viewer

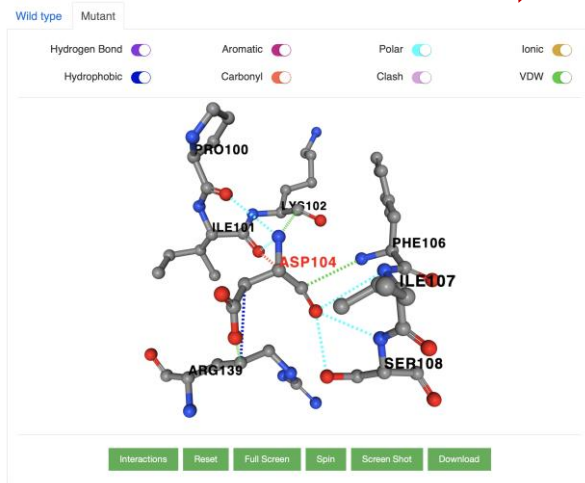

Supplement: pcbi.1008543.s010.pdf [file pcbi.1008543.s010.pdf]
