# Supplementary material for: PremPS: Predicting the impact of missense mutations on protein stability
Source: PubMed Central journal article supplement (PMC7802934; doi:10.1371/journal.pcbi.1008543), 2020-12-30
Supplement: pcbi.1008543.s011.pdf [file pcbi.1008543.s011.pdf]

A.

| Dataset                | All mutations  |               |                 | $\Delta\Delta G_{exp} \geq 0$ |                 | $\Delta\Delta G_{exp} < 0$ |                 |
|------------------------|----------------|---------------|-----------------|-------------------------------|-----------------|----------------------------|-----------------|
|                        | # of mutations | # of proteins | # of structures | # of mutations                | # of structures | # of mutations             | # of structures |
| <b>S2648</b>           | 2648           | 129           | 131             | 2080                          | 119             | 568                        | 93              |
| <b>S5296</b>           | 5296           | 129           | 131             | 2682                          | 131             | 2614                       | 130             |
| <b>S350</b>            | 350            | 66            | 67              | 260                           | 57              | 90                         | 35              |
| <b>S605</b>            | 605            | 55            | 58              | 467                           | 54              | 138                        | 34              |
| <b>S1925</b>           | 1925           | 53            | 55              | 1373                          | 48              | 552                        | 42              |
| <b>S134</b>            | 134            | 1             | 6               | 98                            | 6               | 36                         | 6               |
| <b>p53</b>             | 42             | 1             | 1               | 31                            | 1               | 11                         | 1               |
| <b>S<sup>sym</sup></b> | 684            | 14            | 357             | 350                           | 103             | 334                        | 262             |
| <b>S250</b>            | 250            | 9             | 134             | 125                           | 37              | 125                        | 101             |
| <b>S921</b>            | 921            | 54            | 195             | 634                           | 82              | 287                        | 145             |

One mutation/protein could be mapped to several PDB structures, and the sequences of these structures may be the same or complementary.

B.

| Dataset                | Forward mutations |                 | Reverse mutations |                 |
|------------------------|-------------------|-----------------|-------------------|-----------------|
|                        | # of mutations    | # of structures | # of mutations    | # of structures |
| <b>S<sup>sym</sup></b> | 342               | 15              | 342               | 342             |
| <b>S250</b>            | 125               | 9               | 125               | 125             |
| <b>S2000</b>           | 1000              | 710             | 1000              | 636             |

C.

| <b>S350</b> | <b>S605</b> | <b>S1925</b> | <b>S134</b> | <b>p53</b> | <b>S<sup>sym</sup></b> | <b>S250</b> | <b>S2000</b> | <b>S921</b> |
|-------------|-------------|--------------|-------------|------------|------------------------|-------------|--------------|-------------|
| 350 (67)    | 277 (40)    | 903 (45)     | 41 (1)      | 5 (1)      | 402 (14)               | 218 (9)     | 228 (13)     | 0(0)        |
| 4334 (75)   | 3694 (56)   | 3842 (56)    | 82 (1)      | 10 (1)     | 2444 (18)              | 1342 (13)   | 3356 (50)    | 3710 (47)   |
