# Supplementary material for: PremPS: Predicting the impact of missense mutations on protein stability
Source: PubMed Central journal article supplement (PMC7802934; doi:10.1371/journal.pcbi.1008543), 2020-12-30
Supplement: pcbi.1008543.s012.pdf [file pcbi.1008543.s012.pdf]

| <b>Feature</b>                   | <b>Importance</b> |
|----------------------------------|-------------------|
| $\Delta CS$                      | 4909              |
| $\Delta OMH$                     | 2502              |
| $PSSM$                           | 2398              |
| $SASA_{pro}$ and $SASA_{sol}$    | 2605              |
| $P_{FWY}$ , $P_{RKDE}$ and $P_L$ | 2544              |
| $N_{Hydro}$ and $N_{Charg}$      | 1228              |
