# Supplementary material for: PremPS: Predicting the impact of missense mutations on protein stability
Source: PubMed Central journal article supplement (PMC7802934; doi:10.1371/journal.pcbi.1008543), 2020-12-30
Supplement: pcbi.1008543.s013.pdf [file pcbi.1008543.s013.pdf]

| Algorithm      | Test set | All mutations |      |       | $\Delta\Delta G_{exp} \geq 0$ |      | $\Delta\Delta G_{exp} < 0$ |      |
|----------------|----------|---------------|------|-------|-------------------------------|------|----------------------------|------|
|                |          | R             | RMSE | Slope | R                             | RMSE | R                          | RMSE |
| <b>RF</b>      | S5296    | 0.73          | 1.23 | 1.04  | 0.54                          | 1.20 | 0.50                       | 1.25 |
|                | S921     | 0.78          | 1.48 | 1.52  | 0.72                          | 1.54 | 0.60                       | 1.33 |
| <b>SVM</b>     | S5296    | 0.70*         | 1.27 | 0.97  | 0.52*                         | 1.26 | 0.49                       | 1.29 |
|                | S921     | 0.73*         | 1.53 | 1.34  | 0.67*                         | 1.59 | 0.55*                      | 1.39 |
| <b>XGBoost</b> | S5296    | 0.71*         | 1.25 | 0.99  | 0.53*                         | 1.22 | 0.50                       | 1.28 |
|                | S921     | 0.77          | 1.45 | 1.40  | 0.71                          | 1.51 | 0.59                       | 1.32 |

R: Pearson correlation coefficient between experimental and predicted  $\Delta\Delta G$  values. RMSE (kcal mol<sup>-1</sup>): root-mean-square error. Slope: the slope of the regression line between experimental and predicted  $\Delta\Delta G$  values. All presented values of correlation coefficients are statistically significantly different from zero (p-value  $\ll$  0.01, t-test). \*p-value < 0.01 compared to Random Forest (Hittner2003 test).
