# Supplementary material for: PremPS: Predicting the impact of missense mutations on protein stability
Source: PubMed Central journal article supplement (PMC7802934; doi:10.1371/journal.pcbi.1008543), 2020-12-30
Supplement: pcbi.1008543.s014.pdf [file pcbi.1008543.s014.pdf]

| Method       | All mutations |      |       | $\Delta\Delta G_{exp} \geq 0$ |      | $\Delta\Delta G_{exp} < 0$ |      | Core |      | Surface |      |
|--------------|---------------|------|-------|-------------------------------|------|----------------------------|------|------|------|---------|------|
|              | R             | RMSE | Slope | R                             | RMSE | R                          | RMSE | R    | RMSE | R       | RMSE |
| PremPS       | 0.82          | 1.03 | 1.08  | 0.67                          | 1.01 | 0.63                       | 1.04 | 0.85 | 1.15 | 0.74    | 0.88 |
| PremPS (CV1) | 0.81          | 1.05 | 1.07  | 0.65                          | 1.04 | 0.62                       | 1.06 | 0.84 | 1.17 | 0.72    | 0.90 |
| PremPS (CV2) | 0.80          | 1.09 | 1.08  | 0.63                          | 1.07 | 0.60                       | 1.10 | 0.83 | 1.21 | 0.70    | 0.93 |
| PremPS (CV3) | 0.74          | 1.21 | 1.10  | 0.56                          | 1.20 | 0.54                       | 1.22 | 0.78 | 1.34 | 0.62    | 1.03 |
| PremPS (CV4) | 0.73          | 1.23 | 1.04  | 0.54                          | 1.20 | 0.50                       | 1.25 | 0.77 | 1.37 | 0.58    | 1.06 |
| PremPS (CV5) | 0.73          | 1.23 | 1.03  | 0.54                          | 1.20 | 0.50                       | 1.26 | 0.77 | 1.37 | 0.58    | 1.06 |

R: Pearson correlation coefficient between experimental and predicted  $\Delta\Delta G$  values. RMSE (kcal mol<sup>-1</sup>): root-mean square error. Slope: the slope of the regression line between experimental and predicted  $\Delta\Delta G$  values. All presented values of correlation coefficients are statistically significantly different from zero (p-value  $\ll 0.01$ , t-test). Core/Surface: mutations occur in the protein core/surface.

| Method       | Forward mutations |      | Reverse mutations |      |          |                        |
|--------------|-------------------|------|-------------------|------|----------|------------------------|
|              | R                 | RMSE | R                 | RMSE | $R_{RF}$ | $\langle\delta\rangle$ |
| PremPS       | 0.73              | 1.01 | 0.71              | 1.05 | -0.92    | 0.005                  |
| PremPS (CV1) | 0.72              | 1.02 | 0.69              | 1.06 | -0.92    | 0                      |
| PremPS (CV2) | 0.69              | 1.06 | 0.67              | 1.10 | -0.92    | 0.001                  |
| PremPS (CV3) | 0.66              | 1.17 | 0.65              | 1.19 | -0.92    | 0.001                  |
| PremPS (CV4) | 0.57              | 1.21 | 0.54              | 1.24 | -0.90    | 0.024                  |
| PremPS (CV5) | 0.57              | 1.21 | 0.54              | 1.25 | -0.90    | 0.021                  |

$R_{FR}$  is the Pearson correlation coefficient between predicted  $\Delta\Delta G$  values of the forward and reverse mutations.  $\langle\delta\rangle$  is the average bias ( $= \sum(\Delta\Delta G_F + \Delta\Delta G_R)/N$ ;  $N = 2648$ , the number of pairs). A non-biased prediction should have  $R_{FR}$  and  $\langle\delta\rangle$  equal to -1 and 0, respectively.
