# Supplementary material for: PremPS: Predicting the impact of missense mutations on protein stability
Source: PubMed Central journal article supplement (PMC7802934; doi:10.1371/journal.pcbi.1008543), 2020-12-30
Supplement: pcbi.1008543.s015.pdf [file pcbi.1008543.s015.pdf]

A. All methods were retrained after removing S350 from their training sets.

| Method                    | # of predictions | 350               |             | 309               |             | 87                |             |
|---------------------------|------------------|-------------------|-------------|-------------------|-------------|-------------------|-------------|
|                           |                  | R                 | RMSE        | R                 | RMSE        | R                 | RMSE        |
| <b>PremPS<sup>M</sup></b> | <b>350</b>       | <b>0.72</b>       | <b>1.09</b> | <b>0.74</b>       | <b>1.09</b> | <b>0.81</b>       | <b>1.52</b> |
| mCSM                      | 350              | 0.73 <sup>#</sup> | 1.08        | 0.74 <sup>#</sup> | 1.10        | 0.82 <sup>#</sup> | 1.48        |
| MAESTRO                   | 350              | 0.70 <sup>#</sup> | 1.13        | 0.69 <sup>#</sup> | 1.17        | 0.76 <sup>#</sup> | 1.67        |
| PoPMuSiC v2.0             | 350              | 0.67 <sup>#</sup> | 1.16        | 0.67 <sup>#</sup> | 1.19        | 0.71 <sup>#</sup> | 1.67        |
| PoPMuSiC v1.0             | 350              | 0.62              | 1.24        | 0.63              | 1.25        | 0.70 <sup>#</sup> | 1.66        |
| SDM2                      | 350              | 0.61              | 1.29        | 0.61              | 1.32        | 0.69 <sup>#</sup> | 1.71        |
| SDM                       | 350              | 0.52              | 1.80        | 0.53              | 1.81        | 0.63              | 2.11        |
| Dmutant                   | 350              | 0.48              | 1.81        | 0.47              | 1.87        | 0.57              | 2.31        |
| AUTOMUTE                  | 315              | 0.46              | 1.43        | 0.45              | 1.46        | 0.45              | 1.99        |
| CUPSAT                    | 346              | 0.37              | 1.91        | 0.35              | 1.96        | 0.50              | 2.14        |
| Eris                      | 334              | 0.35              | 4.12        | 0.34              | 4.28        | 0.49              | 3.91        |
| I-Mutant v2.0             | 346              | 0.29              | 1.65        | 0.27              | 1.69        | 0.27              | 2.39        |
| <i>PremPS<sup>P</sup></i> | <i>350</i>       | <i>0.58</i>       | <i>1.28</i> | <i>0.59</i>       | <i>1.30</i> | <i>0.60</i>       | <i>1.94</i> |

The values of R and RMSE for other methods except PremPS were taken from [21, 22, 24, 25] directly. 350 mutations were tested using each method, while some methods failed to compute the  $\Delta\Delta G$  for some mutations, so the predicted  $\Delta\Delta G$  values were set to zero when counted these mutations. 309 mutations for which the  $\Delta\Delta G$  values are available for all methods, and among them 87 mutations whose experimental  $|\Delta\Delta G|$  are  $\geq 2$  kcal mol<sup>-1</sup>.

The differences in R between PremPS (in bold) and other methods are significant except <sup>#</sup>p-value > 0.05 (Fisher1925 test).

**B.** PremPS (in bold) and other methods except Meta-predictor were applied to the dataset of S605 directly. S605 is the training set of Meta-predictor, and the R and RMSE reported by Meta-predictor are the mean values across 1000 tests. Namely, Meta-predictor randomly chose 50% mutations from S605 as training and used the remaining mutations for testing; the procedure was repeated 1000 times.

| Method                    | R           | RMSE        |
|---------------------------|-------------|-------------|
| <b>PremPS</b>             | <b>0.80</b> | <b>1.34</b> |
| Meta-predictor            | 0.73        | 1.29        |
| PoPMuSiC v2.0             | 0.68        | 1.32        |
| DFire                     | 0.64        | 1.84        |
| CUPSAT                    | 0.55        | 1.77        |
| FoldX                     | 0.54        | 1.78        |
| Rosetta                   | 0.54        | 2.34        |
| MultiMutate               | 0.54        | 2.34        |
| EGAD                      | 0.52        | 1.61        |
| I-Mutant v3.0             | 0.51        | 1.52        |
| MUPRO                     | 0.49        | 1.52        |
| SDM                       | 0.46        | 1.96        |
| Hunter                    | 0.32        | 1.89        |
| <i>PremPS<sup>M</sup></i> | <i>0.70</i> | <i>1.51</i> |
| <i>PremPS<sup>P</sup></i> | <i>0.62</i> | <i>1.71</i> |

The values of R and RMSE for other methods were taken from [26].

The differences in R between PremPS and all other methods are significant (p-value < 0.01, Fisher1925 test).

**C.** S1925 is the training dataset of AUTOMUTE. All methods were retrained on this dataset and the R and RMSE are the results of 20-fold cross-validation on S1925.

| Method             | R           | RMSE        |
|--------------------|-------------|-------------|
| <b>PremPS</b>      | <b>0.87</b> | <b>0.90</b> |
| mCSM               | 0.82        | 1.00        |
| AUTOMUTE (REPTree) | 0.79        | 1.10        |
| AUTOMUTE (SVMreg)  | 0.76        | 1.20        |
| I-Mutant v2.0      | 0.71        | 1.30        |

The values of R and RMSE for other methods were taken from [22].

The differences in R between PremPS and other methods are significant (p-value < 0.01, Fisher1925 test).

**D.** Pearson correlation coefficients between experimental and predicted  $\Delta\Delta G$  values for different methods applied on 134 mutations from six high-resolution structures of myoglobin (PDB IDs are shown in the first row). All methods were applied to this dataset directly. AVR: correlation coefficient between experimental and average values of the six outputs.

| Method                    | 1A6G              | 1A6M              | 1BZ6              | 1BZP              | 1U7S              | 2EKT              | AVR               |
|---------------------------|-------------------|-------------------|-------------------|-------------------|-------------------|-------------------|-------------------|
| <b>PremPS</b>             | <b>0.71</b>       | <b>0.72</b>       | <b>0.73</b>       | <b>0.73</b>       | <b>0.75</b>       | <b>0.73</b>       | <b>0.73</b>       |
| I-Mutant v2.0             | 0.65 <sup>#</sup> | 0.65 <sup>#</sup> | 0.64 <sup>#</sup> | 0.65 <sup>#</sup> | 0.64 <sup>#</sup> | 0.65 <sup>#</sup> | 0.65 <sup>#</sup> |
| SDM                       | 0.58 <sup>#</sup> | 0.58              | 0.60 <sup>#</sup> | 0.57              | 0.60              | 0.59              | 0.59              |
| PoPMuSiC v2.1             | 0.54              | 0.55              | 0.56              | 0.57              | 0.55              | 0.55              | 0.56              |
| I-Mutant v3.0             | 0.54              | 0.54              | 0.55              | 0.54              | 0.53              | 0.54              | 0.54              |
| mCSM                      | 0.35              | 0.39              | 0.40              | 0.44              | 0.47              | 0.44              | 0.44              |
| CUPSAT                    | 0.36              | 0.31              | 0.25              | 0.30              | 0.45              | 0.48              | 0.40              |
| <i>PremPS<sup>M</sup></i> | 0.65 <sup>#</sup> | 0.65 <sup>#</sup> | 0.65 <sup>#</sup> | 0.65 <sup>#</sup> | 0.65 <sup>#</sup> | 0.64 <sup>#</sup> | 0.65 <sup>#</sup> |
| <i>PremPS<sup>P</sup></i> | 0.65 <sup>#</sup> | 0.65 <sup>#</sup> | 0.65 <sup>#</sup> | 0.65 <sup>#</sup> | 0.65 <sup>#</sup> | 0.64 <sup>#</sup> | 0.65 <sup>#</sup> |

The values of R and RMSE for other methods were taken from [49].

The differences in R between PremPS and other methods are significant except <sup>#</sup>p-value > 0.05 (Fisher1925 test).

**E.** All methods were tested on the dataset of p53 directly.

| Method                    | R           | RMSE        |
|---------------------------|-------------|-------------|
| <b>PremPS</b>             | <b>0.73</b> | <b>1.41</b> |
| DUET                      | 0.68        | 1.39        |
| mCSM                      | 0.68        | 1.40        |
| PoPMuSiC v2.0             | 0.56        | 1.52        |
| SDM                       | 0.52        | 1.61        |
| iStable                   | 0.49        | 1.59        |
| <i>PremPS<sup>M</sup></i> | 0.72        | 1.47        |
| <i>PremPS<sup>P</sup></i> | 0.72        | 1.47        |

The values of R and RMSE for other methods were taken from [22, 23].

The difference in R between PremPS and other methods is not significant (p-value > 0.05, Fisher1925 test).

F. All methods were applied to the dataset of  $S^{\text{sym}}$  directly.

| Method                    | Forward mutations |             | Reverse mutations |             |                          |                        |
|---------------------------|-------------------|-------------|-------------------|-------------|--------------------------|------------------------|
|                           | R                 | RMSE        | R                 | RMSE        | $R_{\text{FR}}$          | $\langle\delta\rangle$ |
| <b>PremPS</b>             | <b>0.81</b>       | <b>0.96</b> | <b>0.74</b>       | <b>1.12</b> | <b>-0.93</b>             | <b>0.03</b>            |
| DDGun3D                   | 0.56              | 1.42        | 0.53              | 1.46        | -0.99                    | -0.02                  |
| INPS                      | 0.51              | 1.42        | 0.50              | 1.44        | -0.99                    | -0.04                  |
| DDGun                     | 0.48              | 1.47        | 0.48              | 1.50        | -0.99                    | -0.01                  |
| PoPMuSiC <sup>sym</sup>   | 0.48              | 1.58        | 0.48              | 1.62        | -0.77                    | 0.03                   |
| Blind-INPS                | 0.48              | 1.44        | 0.47              | 1.45        | -0.99                    | -0.06                  |
| INPS3D                    | 0.59              | 1.29        | 0.44              | 1.64        | -0.86                    | -0.55                  |
| Rosetta                   | 0.69              | 2.31        | 0.43              | 2.61        | -0.41                    | -0.69                  |
| FoldX                     | 0.63              | 1.56        | 0.39              | 2.13        | -0.38                    | -0.47                  |
| MAESTRO                   | 0.52              | 1.36        | 0.32              | 2.09        | -0.34                    | -0.58                  |
| SDM                       | 0.51              | 1.74        | 0.32              | 2.28        | -0.75                    | -0.32                  |
| PoPMuSiC v2.1             | 0.63              | 1.21        | 0.25              | 2.18        | -0.29                    | -0.71                  |
| mCSM                      | 0.61              | 1.23        | 0.14              | 2.43        | -0.26                    | -0.91                  |
| DUET                      | 0.63              | 1.20        | 0.13              | 2.38        | -0.21                    | -0.84                  |
| MUPRO                     | 0.79 <sup>#</sup> | 0.94        | 0.07              | 2.51        | -0.02                    | -0.97                  |
| CUPSAT                    | 0.39              | 1.71        | 0.05              | 2.88        | -0.54                    | -0.72                  |
| NeEMO                     | 0.72              | 1.08        | 0.02              | 2.35        | 0.09                     | -0.60                  |
| AUTOMUTE                  | 0.73              | 1.07        | -0.01             | 2.61        | -0.06                    | -0.99                  |
| I-Mutant v3.0             | 0.62              | 1.23        | -0.04             | 2.32        | 0.02                     | -0.68                  |
| iStable                   | 0.72              | 1.10        | -0.08             | 2.28        | -0.05                    | -0.60                  |
| STRUM                     | 0.75              | 1.05        | -0.15             | 2.51        | 0.34                     | -0.87                  |
| <i>PremPS<sup>M</sup></i> | <i>0.64</i>       | <i>1.21</i> | <i>0.56</i>       | <i>1.30</i> | <i>-0.91<sup>#</sup></i> | <i>0.03</i>            |
| <i>PremPS<sup>P</sup></i> | <i>0.56</i>       | <i>1.32</i> | <i>0.50</i>       | <i>1.37</i> | <i>-0.89</i>             | <i>0.04</i>            |

The values of R and RMSE for other methods were taken from [48, 55, 57].

$R_{\text{FR}}$  is the Pearson correlation coefficient between predicted  $\Delta\Delta G$  values of the forward and reverse mutations.  $\langle\delta\rangle = \sum(\Delta\Delta G_F + \Delta\Delta G_R)/N$ . A non-biased prediction should have  $R_{\text{FR}} = -1$  and  $\langle\delta\rangle = 0$ .

The differences in R between PremPS and other methods are significant except <sup>#</sup>p-value > 0.05 (Fisher1925 test). The methods are ranked according to the R of reverse mutations.

**G.** All methods were applied to the dataset of S250 directly.

| Mehod                     | R           | R <sub>F</sub>    | R <sub>R</sub> | R <sub>FR</sub>          | <δ>          | Inconsistency |
|---------------------------|-------------|-------------------|----------------|--------------------------|--------------|---------------|
| <b>PremPS</b>             | <b>0.89</b> | <b>0.87</b>       | <b>0.82</b>    | <b>-0.94</b>             | <b>0.04</b>  | <b>12</b>     |
| INPS                      | 0.67        | 0.51              | 0.51           | -0.99                    | -0.01        | 3.2           |
| I-Mutant v2.0             | 0.60        | 0.94              | 0.05           | -0.09                    | -2.10        | 77.6          |
| mCSM                      | 0.47        | 0.65              | -0.04          | -0.15                    | -1.66        | 80.8          |
| MUPRO                     | 0.57        | 0.97              | -0.02          | 0.05                     | -1.85        | 73.6          |
| DUET                      | 0.48        | 0.65              | -0.02          | -0.11                    | -1.54        | 73.6          |
| STRUM                     | 0.60        | 0.84 <sup>#</sup> | -0.06          | 0.06                     | -1.38        | 75.2          |
| <i>PremPS<sup>M</sup></i> | <i>0.78</i> | <i>0.68</i>       | <i>0.61</i>    | <i>-0.92<sup>#</sup></i> | <i>-0.05</i> | <i>7.2</i>    |
| <i>PremPS<sup>P</sup></i> | <i>0.74</i> | <i>0.60</i>       | <i>0.56</i>    | <i>-0.88</i>             | <i>-0.04</i> | <i>4</i>      |

The values of R and RMSE for other methods were taken from [58,59].

R, R<sub>F</sub> and R<sub>R</sub> is the Pearson correlation coefficient between experimental and predicted  $\Delta\Delta G$  values for all, forward and reverse mutations, respectively. R<sub>FR</sub> is the Pearson correlation coefficient between predicted  $\Delta\Delta G$  values of the forward and reverse mutations.  $\langle\delta\rangle = \sum(\Delta\Delta G_F + \Delta\Delta G_R)/N$ . Inconsistency = the percentage of forward mutations and their reverse pairs predicted with the same sign.

The differences in R between PremPS and other methods are significant except <sup>#</sup>p-value > 0.05 (Fisher1925 test). The methods are ranked according to the correlation coefficient of reverse mutations.

**H.** All methods were applied to the dataset of S2000 directly.

| Method                    | R <sub>RF</sub>          | <δ>/2 ± SE         |
|---------------------------|--------------------------|--------------------|
| <b>PremPS</b>             | <b>-0.92</b>             | <b>0.05 ± 0.01</b> |
| INPS                      | -0.95                    | 0.04 ± 0.15        |
| INPS3D                    | -0.82                    | 0.29 ± 0.27        |
| Eris                      | -0.39                    | 1.25 ± 0.11        |
| FoldX                     | -0.15                    | 0.74 ± 0.05        |
| I-Mutant v2.0             | -0.13                    | 0.80 ± 0.01        |
| Rosetta                   | -0.06                    | 2.08 ± 0.12        |
| <i>PremPS<sup>M</sup></i> | <i>-0.92<sup>#</sup></i> | <i>0.04 ± 0.01</i> |
| <i>PremPS<sup>P</sup></i> | <i>-0.89</i>             | <i>0.07 ± 0.01</i> |

The values of R and RMSE for other methods were taken from [55, 56].

SE: standard error.

The differences in R between PremPS and other methods are significant except <sup>#</sup>p-value > 0.05 (Fisher1925 test).
