# Supplementary material for: PremPS: Predicting the impact of missense mutations on protein stability
Source: PubMed Central journal article supplement (PMC7802934; doi:10.1371/journal.pcbi.1008543), 2020-12-30
Supplement: pcbi.1008543.s016.pdf [file pcbi.1008543.s016.pdf]

| Method              | All mutations |      |       | $\Delta\Delta G_{exp} \geq 0$ |      | $\Delta\Delta G_{exp} < 0$ |      | Core              |      | Surface |      |
|---------------------|---------------|------|-------|-------------------------------|------|----------------------------|------|-------------------|------|---------|------|
|                     | R             | RMSE | Slope | R                             | RMSE | R                          | RMSE | R                 | RMSE | R       | RMSE |
| PremPS              | 0.78          | 1.48 | 1.52  | 0.72                          | 1.54 | 0.60                       | 1.33 | 0.82              | 1.81 | 0.55    | 1.11 |
| PremPS <sup>F</sup> | 0.73          | 1.60 | 1.76  | 0.73 <sup>a</sup>             | 1.51 | 0.29                       | 1.79 | 0.80 <sup>b</sup> | 2.00 | 0.50    | 1.15 |
| PremPS <sup>P</sup> | 0.70          | 1.69 | 1.68  | 0.59                          | 1.83 | 0.60 <sup>c</sup>          | 1.31 | 0.75              | 2.13 | 0.48    | 1.17 |
| INP3D               | 0.68          | 1.62 | 1.40  | 0.64                          | 1.61 | 0.38                       | 1.64 | 0.74              | 2.00 | 0.44    | 1.19 |
| INPS                | 0.66          | 1.66 | 1.23  | 0.57                          | 1.76 | 0.46                       | 1.42 | 0.71              | 2.07 | 0.46    | 1.19 |
| PoPMuSiC            | 0.64          | 1.68 | 1.30  | 0.68 <sup>d</sup>             | 1.48 | -                          | 2.06 | 0.70              | 2.09 | 0.39    | 1.22 |
| FoldX               | 0.57          | 2.06 | 0.54  | 0.56                          | 1.99 | 0.22                       | 2.21 | 0.58              | 2.58 | 0.41    | 1.45 |
| mCSM                | 0.52          | 1.85 | 1.26  | 0.57                          | 1.63 | -                          | 2.25 | 0.60              | 2.28 | 0.17    | 1.36 |

Only correlation coefficients with statistically significantly different from zero (p-value < 0.01, t-test) are shown. The differences in R between PremPS and other methods are significant (p-values < 0.01, Hittner2003 test) except <sup>a</sup>p-value = 0.27, <sup>b</sup>p-value = 0.02, <sup>c</sup>p-value = 0.84, and <sup>d</sup>p-value = 0.04.

The differences in R between INP3D and INPS are not significant (p-value > 0.1) except for destabilizing mutations with p-value < 0.01, so the INP3D presents better performance than INPS on S921 dataset.
