# Supplementary material for: PremPS: Predicting the impact of missense mutations on protein stability
Source: PubMed Central journal article supplement (PMC7802934; doi:10.1371/journal.pcbi.1008543), 2020-12-30
Supplement: pcbi.1008543.s017.pdf [file pcbi.1008543.s017.pdf]

**A.**

| Monomer    | Homomer       |           |               |
|------------|---------------|-----------|---------------|
|            | All mutations | Interface | Non-interface |
| 2372 (104) | 276 (27)      | 135 (19)  | 141 (21)      |

**B.**

| Dataset | # of proteins<br>(# of mutations) | # of mapped redundant structures<br>(# of mapped mutations) |
|---------|-----------------------------------|-------------------------------------------------------------|
| S2648   | 99 (2297)                         | 6012 (331648)                                               |
| S921    | 103 (824)                         | 4429 (172253)                                               |

**C.**

| Method                        | # of proteins<br>(# of muts) | # of mapped structs<br>(# of mapped muts) | # of proteins<br>(# of muts) | # of mapped structs<br>(# of mapped muts) |
|-------------------------------|------------------------------|-------------------------------------------|------------------------------|-------------------------------------------|
| <b>S2297</b>                  |                              | <b>S824</b>                               |                              |                                           |
| X-ray                         | 82 (2088)                    |                                           | 96 (760)                     |                                           |
| NMR                           | 17 (209)                     |                                           | 7 (64)                       |                                           |
| <b>RS2297</b>                 |                              | <b>RS824</b>                              |                              |                                           |
| X-ray                         | 90 (2227)                    | 5667 (322671)                             | 102 (795)                    | 4127 (169138)                             |
| NMR                           | 68 (1781)                    | 319 (8223)                                | 49 (741)                     | 269 (2998)                                |
| Cryo-EM                       | 8 (157)                      | 26 (754)                                  | 9 (50)                       | 33 (117)                                  |
| <b>X-ray, NMR and Cryo-EM</b> |                              |                                           |                              |                                           |
| X-ray                         |                              | 1249 (51061)                              |                              | 1258 (3039)                               |
| NMR                           | 7 (94)                       | 92 (1008)                                 | 8 (43)                       | 127 (431)                                 |
| Cryo-EM                       |                              | 25 (691)                                  |                              | 32 (110)                                  |
| <b>X-ray and NMR</b>          |                              |                                           |                              |                                           |
| X-ray                         |                              | 5011 (306441)                             |                              | 4047 (166405)                             |
| NMR                           | 59 (1711)                    | 285 (8042)                                | 48 (715)                     | 264 (2878)                                |
| <b>X-ray and Cryo-EM</b>      |                              |                                           |                              |                                           |
| X-ray                         |                              | 1252 (51250)                              |                              | 1261 (3048)                               |
| Cryo-EM                       | 8 (157)                      | 26 (754)                                  | 9 (46)                       | 33 (113)                                  |
| <b>NMR and Cryo-EM</b>        |                              |                                           |                              |                                           |
| NMR                           |                              | 92 (1008)                                 |                              | 127 (432)                                 |
| Cryo-EM                       | 7 (94)                       | 25 (691)                                  | 8 (44)                       | 32 (111)                                  |

**D.**

| Resolution                                | # of proteins<br>(# of muts) | # of mapped structs<br>(# of mapped muts) | # of proteins<br>(# of muts) | # of mapped structs<br>(# of mapped muts) |
|-------------------------------------------|------------------------------|-------------------------------------------|------------------------------|-------------------------------------------|
| <b>S2297</b>                              |                              | <b>S824</b>                               |                              |                                           |
| ≤ 3Å                                      | 82 (2088)                    |                                           | 96 (760)                     |                                           |
| ≤ 2Å                                      | 60 (1607)                    |                                           | 78 (596)                     |                                           |
| 2Å ~ 3Å                                   | 22 (481)                     |                                           | 18 (164)                     |                                           |
| <b>RS2297</b>                             |                              | <b>RS824</b>                              |                              |                                           |
| ≤ 3Å                                      | 89 (2225)                    | 5533 (318413)                             | 101 (794)                    | 3993 (162479)                             |
| > 3Å                                      | 28 (518)                     | 157 (4939)                                | 27 (435)                     | 164 (6768)                                |
| ≤ 2Å                                      | 80 (2176)                    | 4178 (262487)                             | 94 (782)                     | 2967 (124944)                             |
| 2Å ~ 3Å                                   | 77 (2050)                    | 1355 (55926)                              | 67 (683)                     | 1026 (37535)                              |
| 3Å ~ 4Å                                   | 26 (453)                     | 146 (4737)                                | 25 (402)                     | 147 (6487)                                |
| > 4Å                                      | 9 (194)                      | 11 (202)                                  | 11 (262)                     | 17 (281)                                  |
| <b>≤ 3Å and &gt; 3Å</b>                   |                              |                                           |                              |                                           |
| ≤ 3Å                                      |                              | 2972 (132705)                             |                              | 2886 (140969)                             |
| > 3Å                                      | 27 (516)                     | 156 (4937)                                | 26 (430)                     | 164 (6763)                                |
| <b>≤ 2Å, 2Å ~ 3Å, 3Å ~ 4Å and &gt; 4Å</b> |                              |                                           |                              |                                           |
| ≤ 2Å                                      |                              | 822 (47424)                               |                              | 821 (84838)                               |
| 2Å ~ 3Å                                   | 7 (129)                      | 478 (17901)                               | 9 (229)                      | 486 (30974)                               |
| 3Å ~ 4Å                                   |                              | 90 (3541)                                 |                              | 95 (6134)                                 |
| > 4Å                                      |                              | 9 (137)                                   |                              | 15 (248)                                  |

**E.**

| State                                    | # of proteins<br>(# of muts) | # of mapped structs<br>(# of mapped muts) | # of proteins<br>(# of muts) | # of mapped structs<br>(# of mapped muts) |
|------------------------------------------|------------------------------|-------------------------------------------|------------------------------|-------------------------------------------|
| <b>S2297</b>                             |                              | <b>S824</b>                               |                              |                                           |
| Monomer                                  | 68 (1760)                    |                                           | 82 (600)                     |                                           |
| Homomer                                  | 25 (501)                     |                                           | 20 (200)                     |                                           |
| Heteromer                                | 6 (36)                       |                                           | 1 (24)                       |                                           |
| <b>RS2297</b>                            |                              | <b>RS824</b>                              |                              |                                           |
| Monomer                                  | 90 (2160)                    | 3841 (269705)                             | 95 (812)                     | 2723 (136629)                             |
| Homomer                                  | 71 (2101)                    | 1382 (42214)                              | 65 (716)                     | 1099 (24486)                              |
| Heteromer                                | 49 (1564)                    | 789 (19729)                               | 33 (489)                     | 607 (11138)                               |
| <b>Monomers, homomers and heteromers</b> |                              |                                           |                              |                                           |
| Monomer                                  |                              | 2326 (248857)                             |                              | 2212 (114594)                             |
| Homomer                                  | 35 (1462)                    | 1077 (36894)                              | 30 (450)                     | 1008 (23036)                              |
| Heteromer                                |                              | 653 (18476)                               |                              | 579 (10803)                               |

**F.**

| Sequence identity | # of proteins<br>(# of muts) | # of modeled structs<br>(# of mapped muts) | # of proteins<br>(# of muts) | # of modeled structs<br>(# of mapped muts) |
|-------------------|------------------------------|--------------------------------------------|------------------------------|--------------------------------------------|
|                   | <b>S2297</b>                 |                                            | <b>S824</b>                  |                                            |
| 20-30%            | 37 (607)                     | 415 (7617)                                 | 19 (172)                     | 211 (6071)                                 |
| 30-40%            | 68 (1246)                    | 824 (13810)                                | 35 (314)                     | 369 (3044)                                 |
| 40-50%            | 57 (1128)                    | 417 (7184)                                 | 75 (503)                     | 264 (2235)                                 |
| 50-60%            | 44 (771)                     | 177 (3307)                                 | 26 (212)                     | 102 (582)                                  |
| 60-70%            | 46 (939)                     | 120 (2910)                                 | 31 (371)                     | 76 (656)                                   |
| 70-80%            | 41 (803)                     | 102 (2235)                                 | 69 (466)                     | 119 (893)                                  |
| 80-90%            | 44 (923)                     | 173 (3306)                                 | 28 (369)                     | 153 (2185)                                 |
| 90-100%           | 87 (2131)                    | 561 (17802)                                | 99 (780)                     | 4797 (25598)                               |

**G.**

| RMSD                            | # of proteins<br>(# of muts) | # of modeled structs<br>(# of mapped muts) | # of proteins<br>(# of muts) | # of modeled structs<br>(# of mapped muts) |
|---------------------------------|------------------------------|--------------------------------------------|------------------------------|--------------------------------------------|
|                                 | <b>S2297</b>                 |                                            | <b>S824</b>                  |                                            |
| $\leq 3\text{\AA}$              | 90 (2144)                    | 1926 (42012)                               | 101 (791)                    | 5106 (32764)                               |
| $3\text{\AA} \sim 5\text{\AA}$  | 71 (1308)                    | 494 (9571)                                 | 82 (555)                     | 755 (7098)                                 |
| $5\text{\AA} \sim 10\text{\AA}$ | 50 (997)                     | 224 (2698)                                 | 74 (439)                     | 167 (1035)                                 |
| $> 10\text{\AA}$                | 45 (716)                     | 145 (2890)                                 | 17 (174)                     | 63 (367)                                   |
