# Supplementary material for: PremPS: Predicting the impact of missense mutations on protein stability
Source: PubMed Central journal article supplement (PMC7802934; doi:10.1371/journal.pcbi.1008543), 2020-12-30
Supplement: pcbi.1008543.s018.pdf [file pcbi.1008543.s018.pdf]

| <b>Multimeric state</b>              | <b>Method</b> | <b>All mutations</b> |             | <b>Interface</b> |             | <b>Non-interface</b> |             |
|--------------------------------------|---------------|----------------------|-------------|------------------|-------------|----------------------|-------------|
|                                      |               | <b>R</b>             | <b>RMSE</b> | <b>R</b>         | <b>RMSE</b> | <b>R</b>             | <b>RMSE</b> |
| Homomer                              | PremPS        | 0.95                 | 0.46        | 0.95             | 0.41        | 0.96                 | 0.50        |
|                                      | PremPS (CV4)  | 0.56                 | 1.08        | 0.62             | 0.96        | 0.51                 | 1.18        |
| Monomer<br>extracted from<br>homomer | PremPS        | 0.68*                | 0.98        | 0.64*            | 1.06        | 0.77*                | 0.90        |
|                                      | PremPS (CV4)  | 0.47*                | 1.17        | 0.49*            | 1.15        | 0.51                 | 1.18        |

\*p-value < 0.01 compared to homomer (Hittner2003 test).
