# Supplementary material for: PremPS: Predicting the impact of missense mutations on protein stability
Source: PubMed Central journal article supplement (PMC7802934; doi:10.1371/journal.pcbi.1008543), 2020-12-30
Supplement: pcbi.1008543.s019.pdf [file pcbi.1008543.s019.pdf]

| <b>Dataset</b> | <b>Method</b> | <b>R</b> | <b>RMSE</b> |
|----------------|---------------|----------|-------------|
| S2297          | PremPS        | 0.96     | 0.47        |
|                | PremPS (CV4)  | 0.57     | 1.23        |
| RS2297         | PremPS        | 0.84*    | 0.88        |
|                | PremPS (CV4)  | 0.59     | 1.23        |
| S824           | PremPS        | 0.74     | 1.48        |
| RS824          | PremPS        | 0.71     | 1.61        |

\*p-value < 0.01 compared to S2297 (Fisher1925 test).
