# Supplementary material for: PremPS: Predicting the impact of missense mutations on protein stability
Source: PubMed Central journal article supplement (PMC7802934; doi:10.1371/journal.pcbi.1008543), 2020-12-30
Supplement: pcbi.1008543.s020.pdf [file pcbi.1008543.s020.pdf]

| Method                        |              | X-ray |      | NMR   |      | Cryo-EM |      |
|-------------------------------|--------------|-------|------|-------|------|---------|------|
|                               |              | R     | RMSE | R     | RMSE | R       | RMSE |
| S2297                         | PremPS       | 0.96  | 0.48 | 0.97  | 0.40 |         |      |
|                               | PremPS (CV4) | 0.55  | 1.25 | 0.73* | 0.96 |         |      |
| RS2297                        | PremPS       | 0.84  | 0.88 | 0.81* | 0.91 | 0.91*   | 0.65 |
|                               | PremPS (CV4) | 0.59  | 1.23 | 0.58  | 1.22 | 0.72*   | 1.00 |
| S824                          | PremPS       | 0.75  | 1.50 | 0.65  | 1.20 |         |      |
| RS824                         | PremPS       | 0.71  | 1.61 | 0.73  | 1.72 | 0.64    | 2.37 |
| <b>X-ray, NMR and Cryo-EM</b> |              |       |      |       |      |         |      |
| RS2297                        | PremPS       | 0.91  | 0.66 | 0.80* | 0.78 | 0.91    | 0.67 |
|                               | PremPS (CV4) | 0.72  | 1.01 | 0.51* | 1.08 | 0.72    | 1.02 |
| RS824                         | PremPS       | 0.42  | 3.50 | 0.90* | 1.86 | 0.64*   | 2.43 |
| <b>X-ray and NMR</b>          |              |       |      |       |      |         |      |
| RS2297                        | PremPS       | 0.84  | 0.89 | 0.81* | 0.91 |         |      |
|                               | PremPS (CV4) | 0.60  | 1.24 | 0.57* | 1.23 |         |      |
| RS824                         | PremPS       | 0.72  | 1.61 | 0.74  | 1.75 |         |      |
| <b>X-ray and Cryo-EM</b>      |              |       |      |       |      |         |      |
| RS2297                        | PremPS       | 0.91  | 0.66 |       |      | 0.91    | 0.65 |
|                               | PremPS (CV4) | 0.72  | 1.01 |       |      | 0.72    | 1.00 |
| RS824                         | PremPS       | 0.42  | 3.49 |       |      | 0.64*   | 2.40 |

\*p-value < 0.01 compared to X-ray (Fisher1925 test).
