# Supplementary material for: PremPS: Predicting the impact of missense mutations on protein stability
Source: PubMed Central journal article supplement (PMC7802934; doi:10.1371/journal.pcbi.1008543), 2020-12-30
Supplement: pcbi.1008543.s021.pdf [file pcbi.1008543.s021.pdf]

| Method |              | $\leq 3\text{\AA}$         |      |       |      | $> 3\text{\AA}$            |      |       |      | $\leq 2\text{\AA}$ |      |      |      | $2\text{\AA} \sim 3\text{\AA}$ |      | $3\text{\AA} \sim 4\text{\AA}$ |      | $> 4\text{\AA}$ |  |
|--------|--------------|----------------------------|------|-------|------|----------------------------|------|-------|------|--------------------|------|------|------|--------------------------------|------|--------------------------------|------|-----------------|--|
|        |              | R                          | RMSE | R     | RMSE | R                          | RMSE | R     | RMSE | R                  | RMSE | R    | RMSE | R                              | RMSE | R                              | RMSE |                 |  |
| S2297  | PremPS       | 0.96                       | 0.48 |       |      | 0.97                       | 0.47 | 0.95* | 0.49 |                    |      |      |      |                                |      |                                |      |                 |  |
|        | PremPS (CV4) | 0.55                       | 1.25 |       |      | 0.59                       | 1.24 | 0.42* | 1.29 |                    |      |      |      |                                |      |                                |      |                 |  |
| RS2297 | PremPS       | 0.84                       | 0.87 | 0.58* | 1.36 | 0.85                       | 0.86 | 0.81* | 0.95 | 0.58*              | 1.37 | 0.60 | 1.26 |                                |      |                                |      |                 |  |
|        | PremPS (CV4) | 0.59                       | 1.23 | 0.41* | 1.50 | 0.60                       | 1.22 | 0.57* | 1.28 | 0.40*              | 1.51 | 0.45 | 1.39 |                                |      |                                |      |                 |  |
| S824   | PremPS       | 0.75                       | 1.50 |       |      | 0.76                       | 1.36 | 0.74  | 1.93 |                    |      |      |      |                                |      |                                |      |                 |  |
| RS824  | PremPS       | 0.72                       | 1.61 | 0.56* | 1.57 | 0.73                       | 1.62 | 0.67* | 1.59 | 0.56*              | 1.57 | 0.56 | 1.62 |                                |      |                                |      |                 |  |
|        |              | <b>Overlapped proteins</b> |      |       |      | <b>Overlapped proteins</b> |      |       |      |                    |      |      |      |                                |      |                                |      |                 |  |
| RS2297 | PremPS       | 0.84                       | 0.88 | 0.58* | 1.36 | 0.84                       | 1.02 | 0.73* | 1.19 | 0.46*              | 1.48 | 0.52 | 1.51 |                                |      |                                |      |                 |  |
|        | PremPS (CV4) | 0.60                       | 1.22 | 0.41* | 1.50 | 0.54                       | 1.37 | 0.48* | 1.44 | 0.34*              | 1.55 | 0.38 | 1.61 |                                |      |                                |      |                 |  |
| RS824  | PremPS       | 0.65                       | 1.36 | 0.56* | 1.57 | 0.69                       | 1.32 | 0.65* | 1.38 | 0.56*              | 1.55 | 0.55 | 1.69 |                                |      |                                |      |                 |  |

\*p-value < 0.01 compared to the previous resolution (Fisher1925 test).
