# Supplementary material for: PremPS: Predicting the impact of missense mutations on protein stability
Source: PubMed Central journal article supplement (PMC7802934; doi:10.1371/journal.pcbi.1008543), 2020-12-30
Supplement: pcbi.1008543.s022.pdf [file pcbi.1008543.s022.pdf]

|                                          | Method       | Monomer |      | Homomer |      | Heteromer |      |
|------------------------------------------|--------------|---------|------|---------|------|-----------|------|
|                                          |              | R       | RMSE | R       | RMSE | R         | RMSE |
| S2297                                    | PremPS       | 0.96    | 0.46 | 0.96    | 0.51 | 0.93      | 0.49 |
|                                          | PremPS (CV4) | 0.60    | 1.16 | 0.47*   | 1.44 | 0.49      | 1.17 |
| RS2297                                   | PremPS       | 0.84    | 0.87 | 0.83*   | 0.92 | 0.84      | 0.94 |
|                                          | PremPS (CV4) | 0.59    | 1.22 | 0.58*   | 1.29 | 0.62*     | 1.29 |
| S824                                     | PremPS       | 0.75    | 1.47 | 0.71    | 1.50 | 0.73      | 1.61 |
| RS824                                    | PremPS       | 0.72    | 1.57 | 0.69*   | 1.81 | 0.67*     | 1.69 |
| <b>Monomers, homomers and heteromers</b> |              |         |      |         |      |           |      |
| RS2297                                   | PremPS       | 0.84    | 0.88 | 0.83*   | 0.94 | 0.84      | 0.94 |
|                                          | PremPS (CV4) | 0.61    | 1.22 | 0.58*   | 1.29 | 0.61      | 1.29 |
| RS824                                    | PremPS       | 0.72    | 1.66 | 0.69*   | 1.84 | 0.67*     | 1.69 |

\*p-value < 0.01 compared to monomer (Fisher1925 test).
