# Supplementary material for: PremPS: Predicting the impact of missense mutations on protein stability
Source: PubMed Central journal article supplement (PMC7802934; doi:10.1371/journal.pcbi.1008543), 2020-12-30
Supplement: pcbi.1008543.s023.pdf [file pcbi.1008543.s023.pdf]

| Dataset                                    | Structure       | Method       | 20-30% | 30-40% | 40-50% | 50-60% | 60-70% | 70-80% | 80-90% | 90-100% |
|--------------------------------------------|-----------------|--------------|--------|--------|--------|--------|--------|--------|--------|---------|
| <b>Pearson correlation coefficient (R)</b> |                 |              |        |        |        |        |        |        |        |         |
| S2297                                      | Exp. Structs.   | PremPS       | 0.96   | 0.96   | 0.96   | 0.96   | 0.96   | 0.96   | 0.96   | 0.96    |
|                                            |                 | PremPS (CV4) | 0.62   | 0.58   | 0.57   | 0.55   | 0.56   | 0.58   | 0.53   | 0.57    |
|                                            | All models      | PremPS       | 0.68*  | 0.78*  | 0.81*  | 0.80*  | 0.85*  | 0.86*  | 0.84*  | 0.85*   |
|                                            |                 | PremPS (CV4) | 0.49*  | 0.53   | 0.54   | 0.50   | 0.56   | 0.60   | 0.57   | 0.53    |
|                                            | Selected models | PremPS       | 0.76*  | 0.81*  | 0.83*  | 0.83*  | 0.84*  | 0.85*  | 0.85*  | 0.88*   |
|                                            |                 | PremPS (CV4) | 0.56   | 0.55   | 0.56   | 0.55   | 0.54   | 0.57   | 0.53   | 0.58    |
| S824                                       | Exp. Structs.   | PremPS       | 0.72   | 0.68   | 0.69   | 0.57   | 0.72   | 0.74   | 0.70   | 0.74    |
|                                            | All models      | PremPS       | 0.65   | 0.67   | 0.71   | 0.57   | 0.67   | 0.69   | 0.68   | 0.76    |
|                                            | Selected models | PremPS       | 0.55*  | 0.58   | 0.66   | 0.57   | 0.74   | 0.72   | 0.66   | 0.72    |
| <b>Root-mean-square error (RMSE)</b>       |                 |              |        |        |        |        |        |        |        |         |
| S2297                                      | Exp. Structs.   | PremPS       | 0.47   | 0.49   | 0.50   | 0.47   | 0.50   | 0.49   | 0.49   | 0.47    |
|                                            |                 | PremPS (CV4) | 1.20   | 1.27   | 1.28   | 1.24   | 1.33   | 1.27   | 1.30   | 1.24    |
|                                            | All models      | PremPS       | 1.02   | 1.00   | 1.00   | 0.94   | 0.83   | 0.77   | 0.79   | 0.88    |
|                                            |                 | PremPS (CV4) | 1.24   | 1.31   | 1.36   | 1.32   | 1.23   | 1.15   | 1.16   | 1.31    |
|                                            | Selected models | PremPS       | 1.02   | 0.96   | 0.92   | 0.86   | 0.91   | 0.88   | 0.86   | 0.78    |
|                                            |                 | PremPS (CV4) | 1.27   | 1.30   | 1.30   | 1.24   | 1.34   | 1.28   | 1.30   | 1.23    |
| S824                                       | Exp. Structs.   | PremPS       | 1.59   | 1.41   | 1.38   | 1.46   | 1.35   | 1.36   | 1.59   | 1.51    |
|                                            | All models      | PremPS       | 1.01   | 1.59   | 1.51   | 1.54   | 1.46   | 1.59   | 1.52   | 1.34    |
|                                            | Selected models | PremPS       | 1.76   | 1.52   | 1.42   | 1.46   | 1.35   | 1.38   | 1.66   | 1.53    |

\*p-value < 0.01 compared to experimental structures (Fisher1925 test).
