# Supplementary material for: PremPS: Predicting the impact of missense mutations on protein stability
Source: PubMed Central journal article supplement (PMC7802934; doi:10.1371/journal.pcbi.1008543), 2020-12-30
Supplement: pcbi.1008543.s024.pdf [file pcbi.1008543.s024.pdf]

| Dataset | Method       | $\leq 3\text{\AA}$ |      | $3\text{\AA}\sim 5\text{\AA}$ |      | $5\text{\AA}\sim 10\text{\AA}$ |      | $> 10\text{\AA}$ |      |
|---------|--------------|--------------------|------|-------------------------------|------|--------------------------------|------|------------------|------|
|         |              | R                  | RMSE | R                             | RMSE | R                              | RMSE | R                | RMSE |
| S2272   | PremPS       | 0.83               | 0.88 | 0.77*                         | 1.04 | 0.78                           | 1.07 | 0.57*            | 1.21 |
|         | PremPS (CV4) | 0.54               | 1.25 | 0.50*                         | 1.38 | 0.52                           | 1.41 | 0.36*            | 1.38 |
| S824    | PremPS       | 0.74               | 1.34 | 0.70*                         | 1.32 | 0.59*                          | 1.87 | 0.44*            | 1.51 |

\*p-value < 0.01 compared to the previous RMSD (Fisher1925 test).
